# Supplementary material for: Sub-2 Å Ewald curvature corrected structure of an AAV2 capsid variant
Source: PubMed Central journal article supplement (PMC6128836; doi:10.1038/s41467-018-06076-6), 2018-09-07
Supplement: 41467_2018_6076_MOESM2_ESM.pdf [file 41467_2018_6076_MOESM2_ESM.pdf]

**Editorial Note:** this manuscript has been previously reviewed at another journal that is not operating a transparent peer review scheme. This document only contains reviewer comments and rebuttal letters for versions considered at Nature Communications.
