# Supplementary material for: Sub-2 Å Ewald curvature corrected structure of an AAV2 capsid variant
Source: PubMed Central journal article supplement (PMC6128836; doi:10.1038/s41467-018-06076-6), 2018-09-07
Supplement: 41467_2018_6076_MOESM3_ESM.pdf [file 41467_2018_6076_MOESM3_ESM.pdf]

## **Description of Additional Supplementary Files**

File Name: Supplementary Movie 1

Description: Slice through the density map and model
